# Supplementary material for: Comparison of Workflows for Milk Lipid Analysis: Phospholipids
Source: MDPI journal article supplement (doi:10.3390/foods12010163), 2022-12-28
Supplement: s1 [file s1]

**Table S1.** Detailed information on Mouse Splash® Lipidomix standards (Avanti Lipids).

| Compound Name                                 | Molecular Weight | Exact Mass | Chemical Formula                                                               | Conc. (µg/mL)* | Conc. µM*  |
|-----------------------------------------------|------------------|------------|--------------------------------------------------------------------------------|----------------|------------|
| <b>15:0-18:1(d7) PC</b>                       | 753.11           | 752.61     | C <sub>41</sub> H <sub>73</sub> D <sub>7</sub> NO <sub>8</sub> P               | <b>75.3</b>    | <b>100</b> |
| <b>15:0-18:1(d7) PE</b>                       | 711.03           | 710.56     | C <sub>38</sub> H <sub>67</sub> D <sub>7</sub> NO <sub>8</sub> P               | <b>5.0</b>     | <b>7</b>   |
| <b>15:0-18:1(d7) PS (Na Salt)</b>             | 777.02           | 776.53     | C <sub>39</sub> H <sub>69</sub> D <sub>7</sub> NNaO <sub>10</sub> P            | <b>15.5</b>    | <b>20</b>  |
| <b>15:0-18:1(d7) PG (Na Salt)</b>             | 764.02           | 763.54     | C <sub>39</sub> H <sub>67</sub> D <sub>7</sub> NaO <sub>10</sub> P             | <b>3.8</b>     | <b>5</b>   |
| <b>15:0-18:1(d7) PI (NH<sub>4</sub> Salt)</b> | 847.13           | 846.60     | C <sub>42</sub> H <sub>75</sub> D <sub>7</sub> NO <sub>13</sub> P              | <b>16.9</b>    | <b>20</b>  |
| <b>15:0-18:1(d7) PA (Na Salt)</b>             | 689.94           | 689.50     | C <sub>38</sub> H <sub>61</sub> D <sub>7</sub> NaO <sub>8</sub> P              | <b>6.9</b>     | <b>10</b>  |
| <b>18:1(d7) Lyso PC</b>                       | 528.72           | 528.39     | C <sub>26</sub> H <sub>45</sub> D <sub>7</sub> NO <sub>7</sub> P               | <b>23.8</b>    | <b>45</b>  |
| <b>18:1(d7) Lyso PE</b>                       | 486.64           | 486.35     | C <sub>23</sub> H <sub>39</sub> D <sub>7</sub> NO <sub>7</sub> P               | <b>1.0</b>     | <b>2</b>   |
| <b>18:1(d7) Chol Ester</b>                    | 658.16           | 657.64     | C <sub>45</sub> H <sub>71</sub> D <sub>7</sub> O <sub>2</sub>                  | <b>164.5</b>   | <b>250</b> |
| <b>C18(Plasm)-18:1(d9) PC</b>                 | 781.19           | 780.67     | C <sub>44</sub> H <sub>77</sub> D <sub>9</sub> NO <sub>7</sub> P               | <b>15.6</b>    | <b>20</b>  |
| <b>15:0-18:1(d7) DAG</b>                      | 587.98           | 587.55     | C <sub>36</sub> H <sub>61</sub> D <sub>7</sub> O <sub>5</sub>                  | <b>8.8</b>     | <b>15</b>  |
| <b>15:0-18:1(d7)-15:0 TAG</b>                 | 812.37           | 811.77     | C <sub>51</sub> H <sub>89</sub> D <sub>7</sub> O <sub>6</sub>                  | <b>28.4</b>    | <b>35</b>  |
| <b>d18:1-18:1(d9) SM</b>                      | 738.12           | 737.64     | C <sub>41</sub> H <sub>72</sub> D <sub>9</sub> N <sub>2</sub> O <sub>8</sub> P | <b>14.8</b>    | <b>20</b>  |
| <b>C18(Plasm)-18:1(d9) PE</b>                 | 739.11           | 738.62     | C <sub>41</sub> H <sub>71</sub> D <sub>9</sub> NO <sub>7</sub> P               | <b>3.7</b>     | <b>5</b>   |

\*Concentrations are based on the isotopic purity of each individual compound

**Table S2.** Elution programmes for Hilic-MS.

| Hilic-M4   |     | Hilic-M5   |     | Hilic-M6   |     |
|------------|-----|------------|-----|------------|-----|
| Time (min) | A % | Time (min) | A % | Time (min) | A % |
| 0          | 5   | 0          | 5   | 0          | 5   |
| 8          | 30  | 8          | 20  | 14         | 20  |
| 9          | 50  | 9          | 50  | 15         | 50  |
| 13         | 50  | 13         | 50  | 19         | 50  |
| 14         | 5   | 14         | 5   | 20         | 5   |
| 20         | 5   | 20         | 5   | 26         | 5   |
| 20         | End | 20         | End | 26         | End |

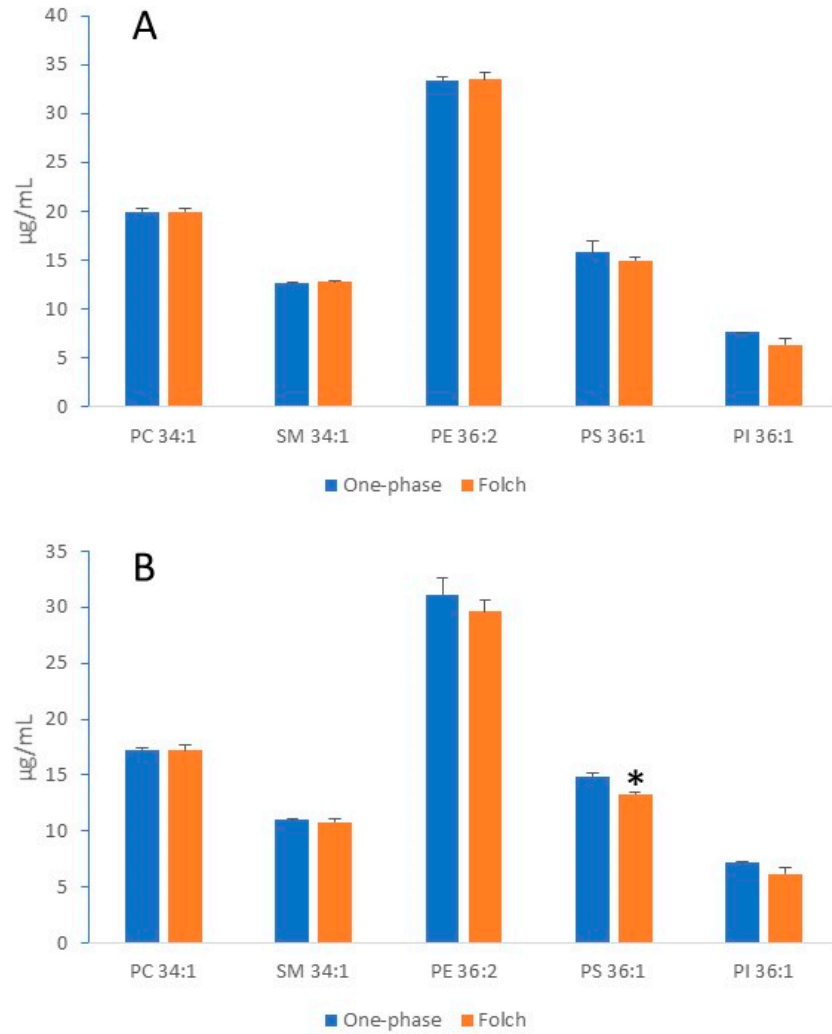

**Figure S1.** Yield of phospholipids as influenced by the extraction methods. A: Milk-11; B: Milk-12. LC separation was by the Hilic-4 method. Each column is the mean value of 3 analyses. Sample dilution factor was 44-fold and 40-fold for the one-phase method and the Folch method respectively. Lipid concentration was measured using the one-point IS calibration method. \* Indicates significant difference by t-test ( $p < 0.05$ ).

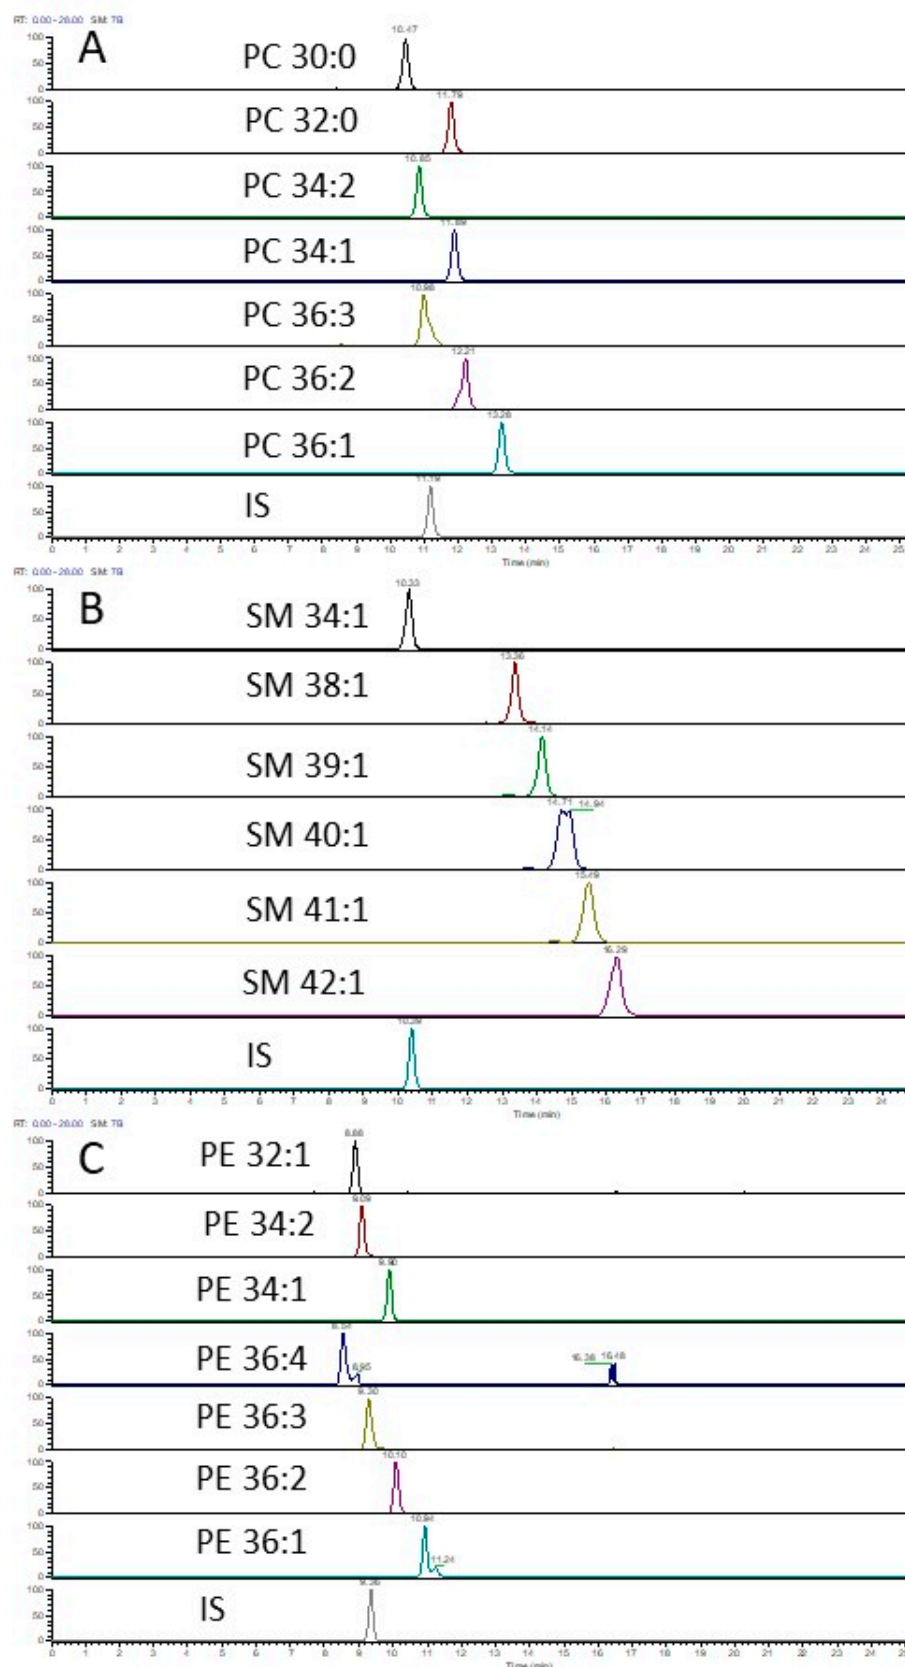

**Figure S2.** Retention time of major PC, SM and PE species of milk vs IS. Milk lipids were extracted by the Folch method. The multistep gradient programme was used for RP-LC-MS.
